# Supplementary material for: 25-Hydroxycholesterol 3-Sulfate Recovers Acetaminophen Induced Acute Liver Injury via Stabilizing Mitochondria in Mouse Models
Source: MDPI journal article supplement (doi:10.3390/cells10113027), 2021-11-05
Supplement: s1 [file s1]

Table S1. Primer Sequence for Real-time Polymerase Chain Reaction

| Gene name     | Gene Accession ID | Forward primer         | Reverse primer          |
|---------------|-------------------|------------------------|-------------------------|
| <i>Fgf11</i>  | NM_010198         | TAGCCTGATCCGACAGAAGC   | GGCAGAACAGTTTGGTGACG    |
| <i>Pik3cb</i> | NM_029094         | CTATGGCAGACAACCTTGACAT | CAGAAGGAAATCGACGGATATGG |
| <i>Mapk1</i>  | NM_001038663      | GGTTGTTCCCAAATGCTGACT  | CAACTTCAATCCTCTTGTGAGGG |
| <i>Pdgfa</i>  | NM_008808         | GAGGAAGCCGAGATACCCC    | TGCTGTGGATCTGACTTCGAG   |
| <i>Pdgfb</i>  | NM_011057         | ATTGTGCGAAAGAAGCCCATC  | GGGTCACTACTGTCTCACACTT  |
| <i>Ywhaz</i>  | NM_001253806      | TGAGCTGTCGAATGAGGAGAG  | CCTCCACGATGACCTACGG     |
| <i>Tlr4</i>   | NM_021297         | AAATGCACTGAGCTTTAGTGGT | TGGCACTCATAATGATGGCAC   |
| <i>Map3k6</i> | NM_016693         | CGGCCTCTCAGTGTGGTCTA   | CCAGCGTCGCAAAGGGTAG     |
| <i>Tgfbr1</i> | NM_009370         | ATATCTGCCATAACCGCACTG  | CTGAAATGAAAGGGCGATCTAGT |
| <i>Map4k4</i> | NM_001252200      | GCACATCTCCATATTCACCACG | GCGCTTACACCAAAATCAACAAG |
| <i>Rn18s</i>  | NR_003278         | AGGGGAGAGCGGGTAAGAGA   | GGACAGGACTAGGCGGAACA    |

Table S 2. Summary of The Whole Genome Bisulfite Sequencing Data

| Sample name | Raw_reads   | clean_reads | Clean_ratio(%) | Uniquely mapped reads | Uniquely mapped rate (%) | sites_covgMean | sites_numCovg10 | BS conversion rate(%) |
|-------------|-------------|-------------|----------------|-----------------------|--------------------------|----------------|-----------------|-----------------------|
| Vehicle     | 310,214,493 | 293,764,421 | 84.68          | 226,110,474           | 76.79                    | 19.85          | 84.79           | 99.495                |
| 25HC3S      | 322,451,254 | 305,610,412 | 84.81          | 233,822,526           | 76.51                    | 20.48          | 85.29           | 99.496                |

Table S 3. Significant Enrichment KEGG Pathways of hypomethylated DMGs in Promoter Region under CG context

| Pathway name                              | P-value  | Pathway name                                             | P-value  | Pathway name                                         | P-value  |
|-------------------------------------------|----------|----------------------------------------------------------|----------|------------------------------------------------------|----------|
| Prostate cancer                           | 0.001957 | MAPK signaling pathway                                   | 0.017418 | Focal adhesion                                       | 0.041224 |
| Cell cycle                                | 0.001957 | Colorectal cancer                                        | 0.023097 | Ubiquitin mediated proteolysis                       | 0.041224 |
| Melanoma                                  | 0.00279  | Pancreatic cancer                                        | 0.024591 | Alcoholism                                           | 0.041224 |
| Phospholipase D signaling pathway         | 0.00279  | Glutamatergic synapse                                    | 0.029023 | Type II diabetes mellitus                            | 0.043909 |
| PI3K-Akt signaling pathway                | 0.002967 | Thyroid hormone signaling pathway                        | 0.029938 | mRNA surveillance pathway                            | 0.044004 |
| Rap1 signaling pathway                    | 0.004439 | Chronic myeloid leukemia                                 | 0.030412 | Adrenergic signaling in cardiomyocytes               | 0.04559  |
| Regulation of actin cytoskeleton          | 0.004439 | Adherens junction                                        | 0.030412 | Endometrial cancer                                   | 0.04559  |
| Axon guidance                             | 0.004699 | Ras signaling pathway                                    | 0.030412 | Hippo signaling pathway                              | 0.045993 |
| Endocrine resistance                      | 0.004699 | Platelet activation                                      | 0.031776 | Lysine degradation                                   | 0.045993 |
| Pathways in cancer                        | 0.004699 | Sphingolipid signaling pathway                           | 0.03248  | Toll-like receptor signaling pathway                 | 0.046911 |
| Endocytosis                               | 0.005013 | Salmonella infection                                     | 0.03248  | AGE-RAGE signaling pathway in diabetic complications | 0.049037 |
| Choline metabolism in cancer              | 0.005013 | Vascular smooth muscle contraction                       | 0.033906 | Chagas disease (American trypanosomiasis)            | 0.049089 |
| Glioma                                    | 0.005013 | FoxO signaling pathway                                   | 0.039573 | Non-small cell lung cancer                           | 0.049089 |
| Hepatitis B                               | 0.005017 | Small cell lung cancer                                   | 0.039573 |                                                      |          |
| Oocyte meiosis                            | 0.008398 | Gap junction                                             | 0.039632 |                                                      |          |
| Hedgehog signaling pathway                | 0.009069 | Hepatitis C                                              | 0.039632 |                                                      |          |
| EGFR tyrosine kinase inhibitor resistance | 0.010398 | Signaling pathways regulating pluripotency of stem cells | 0.04119  |                                                      |          |
| ErbB signaling pathway                    | 0.012624 | Chemokine signaling pathway                              | 0.04119  |                                                      |          |
| HTLV-I infection                          | 0.013355 | Progesterone-mediated oocyte maturation                  | 0.04119  |                                                      |          |
| Viral carcinogenesis                      | 0.014992 | Insulin signaling pathway                                | 0.04119  |                                                      |          |
| Glycerophospholipid metabolism            | 0.014992 | Cytokine-cytokine receptor interaction                   | 0.041224 |                                                      |          |
